# Supplementary material
Source: publisher figshare collection journal article supplement (https://acs.figshare.com/ndownloader/files/5181430)
Supplement: Supplementary file 1 [file 5181430]

#============================================================================== 
data_global
#==============================================================================

# 1. SUBMISSION DETAILS

_publ_contact_author           # Name and address of author for correspondence
;Rita Hazell, Chemistry department, Aarhus University, DK8000 Aarhus C
;
_publ_contact_author_phone        '             '
_publ_contact_author_fax          '             '
_publ_contact_author_email        ?                          
   
_publ_requested_journal           'test'

#==============================================================================

# 3. TITLE AND AUTHOR LIST

_publ_section_title
;
Direct Organocatalytic Asymmetric a-Chlorination of Aldehydes.
;

# The loop structure below should contain the names and addresses of all 
# authors, in the required order of publication. Repeat as necessary.

loop_
	_publ_author_name
'Nis Halland'
'Alan Braunton'
'Stephan Bachmann'
'Mauro Marigo'
'Karl Anker Jorgensen'

	_publ_author_address
;     Department of Chemistry 
      Aarhus University
      Langelandsgade 140
      DK-8000 \%Arhus C
      Denmark              
; 
 
#==============================================================================

data_Cpd4b                         
                                    
#===================================
                                    
# 5. CHEMICAL DATA                  
                                    
_chemical_name_systematic           
;                                   
(R)-2-Chloro-3,3dimethyl-butan-1-ol 
;                                   
_chemical_formula_sum               'C6 H13 Cl O'
_chemical_formula_moiety            'C6 H13 Cl O'
_chemical_formula_weight            136.61
                                    
#===================================
# 6. CRYSTAL DATA                   
                                    
_symmetry_cell_setting              hexagonal                           
_symmetry_space_group_name_H-M      'P 32'
_symmetry_space_group_name_Hall     'P 32'
  
loop_                               
_symmetry_equiv_pos_as_xyz          
   '+x,+y,+z'
   '-y,+x-y,2/3+z'
   '-x+y,-x,1/3+z'
   
_cell_length_a                      17.826(2)
_cell_length_b                      17.826(2)
_cell_length_c                      6.193(2)
_cell_angle_alpha                   90.000
_cell_angle_beta                    90.000
_cell_angle_gamma                   120.000
_cell_volume                        1704.3(6)
_cell_formula_units_Z               9
_cell_measurement_temperature       100
_cell_measurement_reflns_used       5237
_cell_measurement_theta_min         2.28
_cell_measurement_theta_max         28.20
_exptl_crystal_description          plate
_exptl_crystal_colour               colourless
_exptl_crystal_size_max             0.64
_exptl_crystal_size_mid             0.18
_exptl_crystal_size_min             0.10
_exptl_crystal_density_meas         'not measured'                      
_exptl_crystal_density_diffrn       1.198
_exptl_crystal_density_method       'not measured'                      
_exptl_crystal_F_000                 666
_exptl_absorpt_coefficient_mu       0.4153
_exptl_absorpt_correction_type      'none'                              
_exptl_absorpt_process_details      'none'                              
  
#===================================
                                    
# 7. EXPERIMENTAL DATA              
                                    
_diffrn_ambient_temperature         100
_diffrn_radiation_wavelength        0.71073
_diffrn_radiation_type              'Mo K\a'                            
_diffrn_radiation_source            'x-ray tube'                        
_diffrn_radiation_monochromator     'graphite'                          
_diffrn_measurement_device          'Siemens SMART CCD diffractometer'  
_diffrn_measurement_method          '\w rotation scans with narrow frames'
_diffrn_standards_decay_%           0
_diffrn_reflns_number               20015
_diffrn_reflns_av_R_equivalents     0.17
_diffrn_reflns_limit_h_min          .23
_diffrn_reflns_limit_h_max           23
_diffrn_reflns_limit_k_min          -23
_diffrn_reflns_limit_k_max           23
_diffrn_reflns_limit_l_min           -8
_diffrn_reflns_limit_l_max            8
_diffrn_reflns_theta_min            2.28
_diffrn_reflns_theta_max            28.20
_diffrn_reflns_reduction_process    20015
_reflns_number_total                5581
_diffrn_measured_fraction_theta_max 0.999
_diffrn_measured_fraction_theta_full 0.999
_diffrn_reflns_theta_full           28.2
_reflns_number_gt                   3737
_reflns_threshold_expression        I>3\s(I)  
_computing_data_collection          'SMART (Siemens, 1995)'             
_computing_cell_refinement          'SAINT (Siemens, 1995)'             
_computing_data_reduction           'SAINT (Siemens, 1995)'             
_computing_structure_solution       
;                                   
     SIR97 (Altomare et al., 1997 ), KRYSTAL                            
;                                   
_computing_structure_refinement     'modified ORFLS(1962), KRYSTAL'     
_computing_molecular_graphics       
;                                   
      ORTEP-III (Burnett & Johnson,  1996), KRYSTAL                     
;                                   
_computing_publication_material      KRYSTAL                            
_atom_type_scat_source              IntTabIV                            
                                    
#===================================
                                    
# 8. REFINEMENT DATA                
                                    
_refine_special_details             
; The crystals are of low quality; their melting point is just
above room temperature. In spite of the low temperature of the
data collection some disorder of the t-Bu groups is observed
as seen by the large peaks in the difference map between the
methyl carbon atoms and by the unreasonable displacement 
parameters.
;                                   
_refine_ls_structure_factor_coef    F                                   
_refine_ls_matrix_type              full                                
_refine_ls_weighting_scheme         calc                                
_refine_ls_weighting_details        
;                                   
w= 1/{[\s~cs~(F^2^)+B+(1+A)F^2^]^1/2^- |F|}^2^ 
where A = 0.06   and B = 0.5               
;                                   
_refine_ls_hydrogen_treatment       constr
_refine_ls_extinction_method        none                                
_refine_ls_abs_structure_details    
;Least squares refinement included a parameter 
according to Rogers (1981) refined against all
3737 significant reflections, including 1595
Bijvoet pairs. The indication from this - although
weak supports the chirality found in other ways.
;                                   
_refine_ls_abs_structure_Rogers     0.64(33)
_refine_ls_number_reflns            3737
_refine_ls_number_parameters        214
_refine_ls_number_restraints        0
_refine_ls_number_constraints       0
_refine_ls_R_factor_gt              0.103
_refine_ls_wR_factor_ref            0.128
_refine_ls_goodness_of_fit_ref      1.99
_refine_ls_shift/su_max             0.013
_refine_ls_shift/su_mean            0.003
_refine_diff_density_max            2.3(2)
_refine_diff_density_min            -1.2(2)
                                    
 #==========================================
  
 # 9. ATOMIC COORDINATES AND THERMAL PARAMETERS
  
 loop_
 _atom_site_label
 _atom_site_fract_x
 _atom_site_fract_y
 _atom_site_fract_z
 _atom_site_U_iso_or_equiv
 _atom_site_thermal_displace_type
   Cl1      0.8165(1)   0.8183(2)  -0.1059(6)   0.048(2)     Uij 
   Cl2      0.5119(2)   0.8493(2)   0.1459(6)   0.042(2)     Uij 
   Cl3      0.4946(1)   0.3144(2)  -0.1509(6)   0.042(2)     Uij 
   O1       1.0092(4)   0.9503(3)  -0.0350(9)   0.023(4)     Uij 
   C1       0.9089(5)   0.8289(5)  -0.2580(13)  0.017(5)     Uij 
   C2       0.9855(5)   0.8665(5)  -0.1142(14)  0.021(6)     Uij 
   C3       0.8876(5)   0.7424(5)  -0.3587(15)  0.027(6)     Uij 
   C4       0.9629(6)   0.7568(6)  -0.5037(15)  0.032(6)     Uij 
   C5       0.8736(6)   0.6731(6)  -0.1888(17)  0.037(7)     Uij 
   C6       0.8032(7)   0.7038(9)  -0.4988(18)  0.052(10)    Uij 
   O2       0.3850(4)   0.6570(4)   0.0639(10)  0.029(4)     Uij 
   C7       0.5006(6)   0.7583(6)   0.3074(14)  0.023(6)     Uij 
   C8       0.4685(6)   0.6801(6)   0.1499(14)  0.023(6)     Uij 
   C9       0.5866(5)   0.7847(6)   0.4209(15)  0.029(6)     Uij 
   C10      0.6140(10)  0.8601(7)   0.5666(20)  0.061(11)    Uij 
   C11      0.6573(6)   0.7986(7)   0.2520(17)  0.037(7)     Uij 
   C12      0.5700(6)   0.7075(6)   0.5622(16)  0.033(7)     Uij 
   O3       0.6839(4)   0.3960(4)  -0.2838(9)   0.020(4)     Uij 
   C13      0.5820(5)   0.4144(5)  -0.0548(13)  0.019(5)     Uij 
   C14      0.6519(6)   0.4507(5)  -0.2291(15)  0.026(6)     Uij 
   C15      0.5533(6)   0.4749(5)   0.0244(16)  0.026(6)     Uij 
   C16      0.6314(8)   0.5522(8)   0.1303(24)  0.071(11)    Uij 
   C17      0.4847(6)   0.4303(6)   0.2026(16)  0.036(7)     Uij 
   C18      0.5149(9)   0.5040(9)  -0.1546(19)  0.060(12)    Uij 
   H1o      1.0224      0.9859     -0.1471      0.028        Uiso
   H2o      0.3366      0.6498      0.1795      0.034        Uiso
   H3o      0.6606      0.3515     -0.4268      0.026        Uiso
   H1       0.9203      0.8688     -0.3720      0.021        Uiso
   H2a      0.9731      0.8288      0.0057      0.025        Uiso
   H2b      1.0331      0.8703     -0.1925      0.025        Uiso
   H4a      0.9497      0.7029     -0.5666      0.039        Uiso
   H4b      1.0144      0.7786     -0.4205      0.039        Uiso
   H4c      0.9709      0.7971     -0.6142      0.039        Uiso
   H5a      0.8603      0.6192     -0.2517      0.045        Uiso
   H5b      0.8270      0.6641     -0.0973      0.045        Uiso
   H5c      0.9250      0.6938     -0.1057      0.045        Uiso
   H6a      0.7900      0.6500     -0.5615      0.062        Uiso
   H6b      0.8112      0.7436     -0.6106      0.062        Uiso
   H6c      0.7563      0.6955     -0.4095      0.062        Uiso
   H7       0.4574      0.7449      0.4141      0.028        Uiso
   H8a      0.5086      0.6953      0.0345      0.028        Uiso
   H8b      0.4645      0.6319      0.2256      0.028        Uiso
   H10a     0.6674      0.8764      0.6369      0.073        Uiso
   H10b     0.5705      0.8456      0.6730      0.073        Uiso
   H10c     0.6203      0.9078      0.4837      0.073        Uiso
   H11a     0.7106      0.8149      0.3225      0.045        Uiso
   H11b     0.6651      0.8430      0.1544      0.045        Uiso
   H11c     0.6391      0.7463      0.1748      0.045        Uiso
   H12a     0.6234      0.7238      0.6327      0.039        Uiso
   H12b     0.5530      0.6575      0.4758      0.039        Uiso
   H12c     0.5261      0.6959      0.6655      0.039        Uiso
   H13      0.6061      0.4009      0.0658      0.023        Uiso
   H14a     0.6280      0.4609     -0.3552      0.031        Uiso
   H14b     0.6988      0.5039     -0.1786      0.031        Uiso
   H16a     0.6130      0.5908      0.1808      0.085        Uiso
   H16b     0.6766      0.5808      0.0278      0.085        Uiso
   H16c     0.6516      0.5329      0.2480      0.085        Uiso
   H17a     0.4662      0.4689      0.2530      0.043        Uiso
   H17b     0.5089      0.4148      0.3189      0.043        Uiso
   H17c     0.4364      0.3797      0.1457      0.043        Uiso
   H18a     0.4965      0.5426     -0.1041      0.072        Uiso
   H18b     0.4664      0.4544     -0.2144      0.072        Uiso
   H18c     0.5576      0.5324     -0.2632      0.072        Uiso
  
 loop_
 _atom_site_aniso_label 
 _atom_site_aniso_U_11  
 _atom_site_aniso_U_22  
 _atom_site_aniso_U_33  
 _atom_site_aniso_U_12  
 _atom_site_aniso_U_13  
 _atom_site_aniso_U_23  
   Cl1      0.026(1)   0.054(2)   0.065(2)   0.021(1)   0.005(1)  -0.031(1) 
   Cl2      0.052(2)   0.033(1)   0.049(2)   0.026(1)  -0.011(1)   0.008(1) 
   Cl3      0.030(1)   0.032(1)   0.043(1)  -0.002(1)   0.012(1)  -0.019(1) 
   O1       0.036(3)   0.014(3)   0.011(3)   0.005(3)   0.008(2)  -0.002(2) 
   C1       0.023(4)   0.027(4)   0.012(4)   0.020(4)   0.004(3)  -0.002(3) 
   C2       0.021(4)   0.020(4)   0.026(5)   0.014(4)   0.008(4)   0.010(3) 
   C3       0.019(4)   0.024(5)   0.035(5)   0.009(4)   0.003(4)  -0.017(4) 
   C4       0.042(5)   0.032(5)   0.026(5)   0.021(4)   0.019(4)  -0.013(4) 
   C5       0.040(6)   0.018(4)   0.034(5)  -0.001(4)   0.008(4)   0.005(4) 
   C6       0.048(7)   0.075(8)   0.035(6)   0.034(6)  -0.014(5)  -0.012(6) 
   O2       0.027(3)   0.038(4)   0.015(3)   0.011(3)   0.003(2)   0.008(3) 
   C7       0.039(5)   0.030(5)   0.017(4)   0.029(4)   0.000(4)  -0.005(3) 
   C8       0.028(5)   0.027(4)   0.016(4)   0.014(4)   0.005(3)   0.001(3) 
   C9       0.023(5)   0.029(5)   0.028(5)   0.007(4)  -0.011(4)  -0.009(4) 
   C10      0.104(11)  0.040(6)   0.053(7)   0.046(7)  -0.039(7)  -0.023(6) 
   C11      0.015(4)   0.047(6)   0.042(6)   0.009(4)   0.012(4)   0.033(5) 
   C12      0.037(5)   0.037(5)   0.026(5)   0.020(5)  -0.003(4)   0.000(4) 
   O3       0.025(3)   0.025(3)   0.013(3)   0.014(3)   0.000(2)  -0.003(2) 
   C13      0.026(4)   0.016(4)   0.018(4)   0.012(4)  -0.008(3)  -0.002(3) 
   C14      0.034(5)   0.020(4)   0.037(5)   0.022(4)   0.011(4)  -0.003(4) 
   C15      0.027(5)   0.016(4)   0.037(5)   0.012(4)   0.011(4)   0.011(4) 
   C16      0.045(7)   0.061(8)   0.097(11)  0.019(6)   0.007(7)  -0.056(8) 
   C17      0.033(5)   0.032(5)   0.038(6)   0.013(4)   0.008(4)  -0.013(4) 
   C18      0.092(10)  0.092(10)  0.054(7)   0.089(9)   0.031(7)   0.032(7) 
  
 #=================================
                                   
 # 10. MOLECULAR GEOMETRY          
                                   
 loop_                             
     _geom_bond_atom_site_label_1  
     _geom_bond_atom_site_label_2  
     _geom_bond_distance           
  Cl1     C1        1.824(8)   
  Cl2     C7        1.829(8)  
  Cl3     C13       1.785(8) 
  O1      C2        1.422(10)   
  C1      C2        1.479(12)  
  C1      C3        1.524(11) 
  C3      C4        1.526(11)
  C3      C5        1.545(13)   
  C3      C6        1.567(14)  
  O2      C8        1.433(10) 
  C7      C9        1.532(12)
  C7      C8        1.557(12)   
  C9      C12       1.530(13)  
  C9      C10       1.485(13) 
  C9      C11       1.558(13)
  O3      C14       1.396(9)   
  C13     C15       1.489(11) 
  C13     C14       1.526(12)
  C15     C17       1.541(12)   
  C15     C16       1.532(15)  
  C15     C18       1.523(14) 
  O1      H1o       0.89
  C1      H1        0.95
  C2      H2b       0.95
  C2      H2a       0.95
  C4      H4b       0.95
  C4      H4c       0.95
  C4      H4a       0.95
  C5      H5c       0.95
  C5      H5b       0.95
  C5      H5a       0.95
  C6      H6c       0.95
  C6      H6a       0.95
  C6      H6b       0.95
  O2      H2o       1.08
  C7      H7        0.95
  C8      H8a       0.95
  C8      H8b       0.95
  C10     H10a      0.95
  C10     H10b      0.95
  C10     H10c      0.95
  C11     H11a      0.95
  C11     H11b      0.95
  C11     H11c      0.95
  C12     H12a      0.95
  C12     H12b      0.95
  C12     H12c      0.95
  O3      H3o       1.12
  C13     H13       0.95
  C14     H14a      0.95
  C14     H14b      0.95
  C16     H16a      0.95
  C16     H16b      0.95
  C16     H16c      0.95
  C17     H17a      0.95
  C17     H17b      0.95
  C17     H17c      0.95
  C18     H18a      0.95
  C18     H18b      0.95
  C18     H18c      0.95

 loop_                             
     _geom_angle_atom_site_label_1 
     _geom_angle_atom_site_label_2 
     _geom_angle_atom_site_label_3 
     _geom_angle             
  C3      C1      C2         114.3(6)   
  Cl1     C1      C2         108.5(5)  
  Cl1     C1      C3         110.6(5) 
  C1      C2      O1         114.0(6)
  C4      C3      C1         108.5(6)   
  C5      C3      C1         112.9(7)  
  C6      C3      C1         111.7(7) 
  C5      C3      C4         108.2(8)
  C6      C3      C4         108.6(7)   
  C6      C3      C5         106.8(8)  
  C8      C7      C9         115.2(6) 
  Cl2     C7      C9         109.2(6)
  Cl2     C7      C8         106.2(5)   
  C7      C8      O2         110.8(6)  
  C10     C9      C12        107.2(8) 
  C7      C9      C12        105.8(7)
  C11     C9      C12        107.8(7)   
  C7      C9      C10        112.4(8)  
  C11     C9      C10        113.0(9) 
  C11     C9      C7         110.3(7)
  C14     C13     C15        115.4(6)   
  Cl3     C13     C15        112.9(6)  
  Cl3     C13     C14        107.9(5) 
  C13     C14     O3         114.1(7)
  C17     C15     C13        109.5(7)   
  C16     C15     C13        107.8(8)  
  C18     C15     C13        112.5(8) 
  C16     C15     C17        106.7(8)
  C18     C15     C17        108.7(7)   
  C18     C15     C16        111.5(9)  
  C2      O1      H1o        108.3
  C2      C1      H1         107.8
  C3      C1      H1         107.8
  Cl1     C1      H1         107.7
  H2a     C2      H2b        109.5
  O1      C2      H2b        108.3
  C1      C2      H2b        108.3
  O1      C2      H2a        108.3
  C1      C2      H2a        108.3
  H4c     C4      H4b        109.4
  H4a     C4      H4b        109.7
  C3      C4      H4b        109.7
  H4a     C4      H4c        109.7
  C3      C4      H4c        109.7
  C3      C4      H4a        108.5
  H5b     C5      H5c        109.5
  H5a     C5      H5c        108.7
  C3      C5      H5c        108.6
  H5a     C5      H5b        108.6
  C3      C5      H5b        108.6
  C3      C5      H5a        112.8
  H6a     C6      H6c        109.0
  H6b     C6      H6c        109.4
  C3      C6      H6c        108.9
  H6b     C6      H6a        109.0
  C3      C6      H6a        111.7
  C3      C6      H6b        108.9
  C8      O2      H2o        116.2
  C9      C7      H7         108.6
  C8      C7      H7         108.8
  Cl2     C7      H7         108.7
  H8a     C8      H8b        109.5
  O2      C8      H8b        109.1
  C7      C8      H8b        109.2
  O2      C8      H8a        109.1
  C7      C8      H8a        109.2
  H10b    C10     H10a       108.7
  H10c    C10     H10a       108.7
  C9      C10     H10a       112.4
  H10c    C10     H10b       109.6
  C9      C10     H10b       108.8
  C9      C10     H10c       108.7
  H11a    C11     H11b       109.3
  H11c    C11     H11b       109.5
  C9      C11     H11b       109.2
  H11c    C11     H11a       109.3
  C9      C11     H11a       110.2
  C9      C11     H11c       109.2
  H12c    C12     H12a       110.3
  H12b    C12     H12a       110.4
  C9      C12     H12a       105.9
  H12b    C12     H12c       109.5
  C9      C12     H12c       110.4
  C9      C12     H12b       110.4
  C14     O3      H3o        123.3
  C15     C13     H13        106.7
  C14     C13     H13        106.7
  Cl3     C13     H13        106.8
  H14b    C14     H14a       109.5
  O3      C14     H14a       108.3
  C13     C14     H14a       108.3
  O3      C14     H14b       108.3
  C13     C14     H14b       108.3
  H16b    C16     H16c       109.5
  H16a    C16     H16c       109.8
  C15     C16     H16c       109.9
  H16a    C16     H16b       109.8
  C15     C16     H16b       110.0
  C15     C16     H16a       107.8
  H17a    C17     H17b       109.5
  H17c    C17     H17b       109.4
  C15     C17     H17b       109.5
  H17c    C17     H17a       109.4
  C15     C17     H17a       109.6
  C15     C17     H17c       109.5
  H18a    C18     H18b       108.7
  H18c    C18     H18b       109.5
  C15     C18     H18b       108.7
  H18c    C18     H18a       108.7
  C15     C18     H18a       112.5
  C15     C18     H18c       108.7

 loop_                             
 _publ_manuscript_incl_extra_item 
 '_geom_bond_atom_site_label_D'
 '_geom_bond_atom_site_label_H'
 '_geom_contact_atom_site_label_A'
 '_geom_bond_distance_DH'      
 '_geom_contact_distance_HA'      
 '_geom_contact_distance_DA'      
 '_geom_angle_DHA'        
 '_geom_contact_site_symmetry_A'  
  
 loop_                             
     _geom_bond_atom_site_label_D  
     _geom_bond_atom_site_label_H  
     _geom_contact_atom_site_label_A  
     _geom_bond_distance_DH        
     _geom_contact_distance_HA        
     _geom_contact_distance_DA        
     _geom_angle_DHA          
     _geom_contact_site_symmetry_A    
  O1  H1o  O1  0.89  1.78  2.670(6) 178.9(5)  3_675 
  O2  H2o  O2  1.08  1.67  2.716(7) 159.8(3)  2_664 
  O3  H3o  O3  1.12  1.59  2.694(6) 164.8(2)  3_665 
  
